# Supplementary material for: Gene Mutations and Genomic Rearrangements in the Mouse as a Result of Transposon Mobilization from Chromosomal Concatemers
Source: PubMed Central journal article supplement (PMC1584263; doi:10.1371/journal.pgen.0020156), 2006-09-29
Supplement: pgen.0020156.st001.pdf [file pgen.0020156.st001.pdf]

**Table S1: Insertion data**

| seq ID   | identity | Chr | position <sup>a</sup> | hit <sup>b</sup> | Orient <sup>c</sup> | description                                                                                                                                                                                                                                                  |
|----------|----------|-----|-----------------------|------------------|---------------------|--------------------------------------------------------------------------------------------------------------------------------------------------------------------------------------------------------------------------------------------------------------|
| 03A-0118 | 100      | 1   | 16,702,060            | ENSMUSESTG       | v5                  |                                                                                                                                                                                                                                                              |
| 03A-0142 | 100      | 1   | 45,259,459            | nothing          |                     |                                                                                                                                                                                                                                                              |
| 03A-0273 | 100      | 1   | 66,279,744            | GENSCAN          |                     |                                                                                                                                                                                                                                                              |
| 03A-0227 | 95+      | 1   | 125,574,520           | Gpr39            | tTA                 | G protein-coupled receptor 39<br>[Source:MarkerSymbol;Acc:MGI:1918361]                                                                                                                                                                                       |
| 03A-0075 | 100      | 1   | 180,102,143           | Csc42bpa         | tTA                 | Cdc42 binding protein kinase alpha<br>[Source:MarkerSymbol;Acc:MGI:2441841]                                                                                                                                                                                  |
| 03A-0233 | 91+      | 2   | 22,353,080            | Myo3a            | tTA                 | Myosin IIIA (EC 2.7.1.37).<br>[Source:Uniprot/SWISSPROT;Acc:Q8K3H5]                                                                                                                                                                                          |
| 03A-0228 | 100      | 2   | 40,407,579            | nothing          |                     |                                                                                                                                                                                                                                                              |
| 03A-0112 | 100      | 2   | 55,436,182            | kcnj3            | tTA                 | G protein-activated inward rectifier potassium channel 1 (GIRK1) (Potassium channel, inwardly rectifying, subfamily J, member 3) (Inward rectifier K <sup>+</sup> channel Kir3.1) (KGA)                                                                      |
| 03A-0224 | 100      | 2   | 87,753,810            | nothing          |                     |                                                                                                                                                                                                                                                              |
| 03A-0058 | 98+      | 2   | 131,063,998           | Adra1d           | tTA                 | adrenergic receptor, alpha 1d<br>[Source:MarkerSymbol;Acc:MGI:106673]                                                                                                                                                                                        |
| 03A-0125 | 99+      | 2   | 148,046,460           | nothing          |                     |                                                                                                                                                                                                                                                              |
| 03A-0272 | 100      | 3   | 22,850,979            | nothing          |                     |                                                                                                                                                                                                                                                              |
| 03A-0241 | 100      | 4   | 122,663,707           | Macf1            | tTA                 | Microtubule-actin crosslinking factor 1 (Actin cross-linking family 7).<br>[Source:Uniprot/SWISSPROT;Acc:Q9QXZ0]                                                                                                                                             |
| 03A-0162 | 100      | 5   | 129,871,376           | Caln1            | tTA                 | Calneuron 1.<br>[Source:Uniprot/SWISSPROT;Acc:Q9JJG7]                                                                                                                                                                                                        |
| 03A-0130 | 100      | 5   | 143,554,337           | nothing          |                     |                                                                                                                                                                                                                                                              |
| 03A-0231 | 100      | 5   | 146,879,116           | ENSMUSESTG       | v5                  |                                                                                                                                                                                                                                                              |
| 03A-0073 | 100      | 5   | 149,611,803           | GENSCAN          |                     |                                                                                                                                                                                                                                                              |
| 03A-0320 | 91+      | 6   | 6,130,080             | GENSCAN          |                     |                                                                                                                                                                                                                                                              |
| 03A-0329 | 100      | 6   | 61,300,534            | GENSCAN          |                     |                                                                                                                                                                                                                                                              |
| 03A-0124 | 100      | 6   | 62,658,593            | nothing          |                     |                                                                                                                                                                                                                                                              |
| 03A-0288 | 100      | 6   | 62,658,594            | nothing          |                     |                                                                                                                                                                                                                                                              |
| 03A-0183 | 100      | 6   | 147,279,984           | Itpr5            | v5                  | Inositol 1,4,5-trisphosphate receptor type 2 (Type 2 inositol 1,4,5- trisphosphate receptor) (Type 2 InsP3 receptor) (IP3 receptor isoform 2) (InsP3R2) (Inositol 1,4,5-trisphosphate type V receptor) (Fragments).<br>[Source:Uniprot/SWISSPROT;Acc:Q9Z329] |
| 03A-0146 | 91+      | 7   | 41,742,312            | GENSCAN          |                     |                                                                                                                                                                                                                                                              |
| 03A-0167 | 100      | 7   | 90,754,185            | Odz4             | v5                  | odd Oz/ten-m homolog 4 (Drosophila)<br>[Source:MarkerSymbol;Acc:MGI:2447063]                                                                                                                                                                                 |
| 03A-0117 | 100      | 7   | 96,783,421            | nothing          |                     |                                                                                                                                                                                                                                                              |
| 03A-0091 | 100      | 8   | 48,422,540            | nothing          |                     |                                                                                                                                                                                                                                                              |
| 03A-0229 | 100      | 8   | 90,228,185            | Chd9             | v5                  | chromodomain helicase DNA binding protein 9<br>[Source:MarkerSymbol;Acc:MGI:1924001]                                                                                                                                                                         |
| 03A-0077 | 100      | 9   | 9,226,929             | Q9D333           | v5                  | Adult male colon cDNA, RIKEN full-length enriched library, clone:9030420J04 product:RIKEN cDNA 9030420J04. Source: Uniprot/SPTREMBL Q9D333                                                                                                                   |
| 03A-0128 | 100      | 10  | 22,570,444            | ENSMUSG          | v5                  |                                                                                                                                                                                                                                                              |
| 03A-0154 | 100      | 10  | 22,570,444            | ENSMUSG          | v5                  |                                                                                                                                                                                                                                                              |
| 03A-0153 | 98+      | 10  | 50,206,677            | LINE element     |                     |                                                                                                                                                                                                                                                              |
| 03A-0232 | 100      | 10  | 100,245,703           | GENSCAN          |                     |                                                                                                                                                                                                                                                              |
| 03A-0132 | 100      | 10  | 102,520,111           | nothing          |                     |                                                                                                                                                                                                                                                              |
| 03A-0105 | 100      | 10  | 110,229,348           | nothing          |                     |                                                                                                                                                                                                                                                              |
| 03A-0359 | 100      | 10  | 112,582,818           | GENSCAN          |                     |                                                                                                                                                                                                                                                              |
| 03A-0029 | 97+      | 10  | 113,468,399           | nothing          |                     |                                                                                                                                                                                                                                                              |
| 03A-0286 | 99+      | 11  | 20,386,036            | GENSCAN          |                     |                                                                                                                                                                                                                                                              |
| 03A-0225 | 98+      | 11  | 32,726,257            | GENSCAN          |                     |                                                                                                                                                                                                                                                              |
| 03A-0296 | 100      | 11  | 38,387,305            | nothing          |                     |                                                                                                                                                                                                                                                              |

Table S1 Continued

| seq ID   | identity | Chr | position <sup>a</sup> | hit <sup>b</sup>                  | Orient. <sup>c</sup>       | description                                                                                                 |
|----------|----------|-----|-----------------------|-----------------------------------|----------------------------|-------------------------------------------------------------------------------------------------------------|
| 03A-0126 | 100      | 11  | 38,943,644            | GENSCAN                           |                            |                                                                                                             |
| 03A-0193 | 100      | 11  | 39,119,812            | ENSMUSG                           | tTA                        |                                                                                                             |
| 03A-0325 | 100      | 11  | 39,633,085            | GENSCAN                           |                            |                                                                                                             |
| 03A-0057 | 99+      | 11  | 39,963,249            | RP23-31O3.1                       |                            | No description                                                                                              |
| 03A-0279 | 100      | 11  | 44,820,144            | nothing                           |                            |                                                                                                             |
| 03A-0180 | 100      | 11  | 48,150,349            | GENSCAN                           |                            |                                                                                                             |
| 03A-0234 | 100      | 11  | 48,219,501            | GENSCAN                           |                            |                                                                                                             |
| 03A-0310 | 100      | 11  | 54,289,495            | Rapgef6                           | tTA                        | Rap guanine nucleotide exchange factor (GEF) 6 [Source:MarkerSymbol;Acc:MGI:2384761]                        |
| 03A-0355 | 100      | 11  | 62,027,478            | Ttc19                             | tTA                        | tetratricopeptide repeat domain 19 [Source:MarkerSymbol;Acc:MGI:1920045]                                    |
| 03A-0220 | 100      | 11  | 62,042,119            | Ttc19 (3'UTR) and Ncor1 (3'UTR)   | v5 (Ttc19) and tTA (Ncor1) | tetratricopeptide repeat domain 19 [Source:MarkerSymbol;Acc:MGI:1920045]<br>nuclear receptor co-repressor 1 |
| 03A-0168 | 100      | 11  | 63,090,815            | GENSCAN                           |                            |                                                                                                             |
| 03A-0376 | 100      | 11  | 64,482,102            | GENSCAN                           |                            |                                                                                                             |
| 03A-0375 | 99+      | 11  | 64,570,290            | GENSCAN                           |                            |                                                                                                             |
| 03A-0063 | 100      | 11  | 66,910,670            | Myh2                              | v5                         | myosin, heavy polypeptide 2, skeletal muscle, adult                                                         |
| 03A-0314 | 94+      | 11  | 73,993,080            | NM_011002                         |                            |                                                                                                             |
| 03A-0321 | 100      | 11  | 79,485,485            | RP23-307I20.1                     | v5                         |                                                                                                             |
| 03A-0098 | 100      | 11  | 80,135,251            | GENSCAN                           |                            |                                                                                                             |
| 03A-0349 | 100      | 11  | 81,418,900            | Accn1 AND GENSCAN                 | v5 (Accn1)                 | amiloride-sensitive cation channel 1, neuronal (degenerin) [Source:MarkerSymbol;Acc:MGI:1100867]            |
| 03A-0366 | 99+      | 11  | 81,429,851            | Accn1 AND GENSCAN                 | tTA (Accn1)                | amiloride-sensitive cation channel 1, neuronal (degenerin) [Source:MarkerSymbol;Acc:MGI:1100867]            |
| 03A-0284 | 100      | 11  | 84,675,962            | nothing                           |                            |                                                                                                             |
| 03A-0370 | 100      | 11  | 88,050,914            | nothing                           |                            |                                                                                                             |
| 03A-0163 | 100      | 11  | 88,250,423            | Msih2, GENSCAN                    | v5 (Mshi2)                 | Musashi homolog 2 (Drosophila) [Source:MarkerSymbol;Acc:MGI:1923876]                                        |
| 03A-0212 | 100      | 11  | 88,283,913            | Msih2                             | tTA                        | Musashi homolog 2 (Drosophila) [Source:MarkerSymbol;Acc:MGI:1923876]                                        |
| 03A-0332 | 100      | 11  | 88,565,723            | GENSCAN                           |                            |                                                                                                             |
| 03A-0274 | 100      | 11  | 88,814,203            | GENSCAN and RP23-176J13.6 (3'UTR) | tTA (RP23-176J13.6)        |                                                                                                             |
| 03A-0204 | 99+      | 11  | 89,247,242            | Q5SRA9_MOUSE                      | tTA                        | Novel protein (Likely ortholog to homo sapiens FLJ38335) (Fragment). Source: Uniprot/SPTREMBL Q5SRA9        |
| 03A-0095 | 100      | 11  | 89,315,247            | Q5SRA9_MOUSE                      | v5                         | Novel protein (Likely ortholog to homo sapiens FLJ38335) (Fragment). Source: Uniprot/SPTREMBL Q5SRA9        |
| 03A-0265 | 100      | 11  | 89,322,258            | Q5SRA9_MOUSE                      | v6                         | Novel protein (Likely ortholog to homo sapiens FLJ38335) (Fragment). Source: Uniprot/SPTREMBL Q5SRA9        |
| 03A-0381 | 96+      | 11  | 89,337,401            | Q5SRA9_MOUSE                      | tTA                        | Novel protein (Likely ortholog to homo sapiens FLJ38335) (Fragment). Source: Uniprot/SPTREMBL Q5SRA9        |
| 03A-0353 | 100      | 11  | 89,520,744            | GENSCAN                           |                            |                                                                                                             |
| 03A-0114 | 100      | 11  | 89,733,741            | GENSCAN                           |                            |                                                                                                             |
| 03A-0129 | 97+      | 11  | 89,737,545            | GENSCAN                           |                            |                                                                                                             |
| 03A-0304 | 100      | 11  | 89,867,873            | GENSCAN                           |                            |                                                                                                             |
| 03A-0275 | 98+      | 11  | 89,872,893            | GENSCAN                           |                            |                                                                                                             |
| 03A-0093 | 97+      | 11  | 89,946,442            | nothing                           |                            |                                                                                                             |
| 03A-0159 | 100      | 11  | 89,982,392            | GENSCAN                           |                            |                                                                                                             |

Table S1 Continued

| seq ID   | identity | Chr | position <sup>a</sup> | hit <sup>b</sup>  | Orient. <sup>c</sup> | description                                                                                                        |
|----------|----------|-----|-----------------------|-------------------|----------------------|--------------------------------------------------------------------------------------------------------------------|
| 03A-0280 | 100      | 11  | 90,065,494            | Mmd               | tTA                  | monocyte to macrophage differentiation-associated                                                                  |
| 03A-0292 | 99+      | 11  | 90,118,225            | nothing           |                      |                                                                                                                    |
| 03A-0315 | 100      | 11  | 90,138,937            | nothing           |                      |                                                                                                                    |
| 03A-0216 | 100      | 11  | 90,161,624            | Hlf (5'UTR)       | v5                   | hepatic leukemia factor<br>[Source:MarkerSymbol;Acc:MGI:96108]                                                     |
| 03A-0059 | 100      | 11  | 90,191,017            | Hlf               | tTA                  | hepatic leukemia factor<br>[Source:MarkerSymbol;Acc:MGI:96108]                                                     |
| 03A-0061 | 100      | 11  | 90,197,484            | Hlf               | tTA                  | hepatic leukemia factor<br>[Source:MarkerSymbol;Acc:MGI:96108]                                                     |
| 03A-0076 | 100      | 11  | 90,336,388            | Stxbp4            | tTA                  | syntaxin binding protein 4<br>[Source:MarkerSymbol;Acc:MGI:1342296]                                                |
| 03A-0367 | 100      | 11  | 90,346,182            | Stxbp4            | v5                   | syntaxin binding protein 4<br>[Source:MarkerSymbol;Acc:MGI:1342296]                                                |
| 03A-0377 | 99+      | 11  | 90,409,879            | Stxbp4            | v5                   | syntaxin binding protein 4<br>[Source:MarkerSymbol;Acc:MGI:1342296]                                                |
| 03A-0297 | 99+      | 11  | 90,468,899            | Srcasm and Tom111 | v5                   | Src activating and signaling molecule and Target of myb1-like 1 (chicken)<br>[Source:MarkerSymbol;Acc:MGI:1919193] |
| 03A-0186 | 100      | 11  | 90,540,640            | nothing           |                      |                                                                                                                    |
| 03A-0122 | 100      | 11  | 90,547,619            | nothing           |                      |                                                                                                                    |
| 03A-0036 | 100      | 11  | 90,576,639            | GENSCAN           |                      |                                                                                                                    |
| 03A-0192 | 100      | 11  | 90,641,443            | RP23-219D8.1      | tTA                  |                                                                                                                    |
| 03A-0291 | 100      | 11  | 90,664,024            | RP23-219D8.1      | v5                   |                                                                                                                    |
| 03A-0155 | 100      | 11  | 90,795,830            | GENSCAN           |                      |                                                                                                                    |
| 03A-0215 | 100      | 11  | 90,796,368            | GENSCAN           |                      |                                                                                                                    |
| 03A-0127 | 100      | 11  | 90,855,319            | GENSCAN           |                      |                                                                                                                    |
| 03A-0334 | 100      | 11  | 91,233,208            | GENSCAN           |                      |                                                                                                                    |
| 03A-0011 | 100      | 11  | 91,326,753            | nothing           |                      |                                                                                                                    |
| 03A-0119 | 99+      | 11  | 91,439,069            | nothing           |                      |                                                                                                                    |
| 03A-0335 | 94+      | 11  | 91,512,812            | GENSCAN           |                      |                                                                                                                    |
| 03A-0078 | 98+      | 11  | 91,624,576            | nothing           |                      |                                                                                                                    |
| 03A-0207 | 100      | 11  | 91,788,257            | GENSCAN           |                      |                                                                                                                    |
| 03A-0181 | 100      | 11  | 91,828,307            | GENSCAN           |                      |                                                                                                                    |
| 03A-0384 | 98+      | 11  | 91,867,809            | GENSCAN           |                      |                                                                                                                    |
| 03A-0308 | 100      | 11  | 91,932,735            | nothing           |                      |                                                                                                                    |
| 03A-0100 | 100      | 11  | 92,136,825            | nothing           |                      |                                                                                                                    |
| 03A-0351 | 100      | 11  | 92,320,484            | nothing           |                      |                                                                                                                    |
| 03A-0071 | 100      | 11  | 92,472,167            | GENSCAN           |                      |                                                                                                                    |
| 03A-0089 | 100      | 11  | 92,720,039            | GENSCAN           |                      |                                                                                                                    |
| 03A-0222 | 100      | 11  | 92,723,469            | GENSCAN           |                      |                                                                                                                    |
| 03A-0282 | 100      | 11  | 92,757,285            | nothing           |                      |                                                                                                                    |
| 03A-0033 | 100      | 11  | 92,982,091            | Car10             | tTA                  | carbonic anhydrase 10<br>[Source:MarkerSymbol;Acc:MGI:1919855]                                                     |
| 03A-0213 | 100      | 11  | 93,190,010            | Car10             | tTA                  | carbonic anhydrase 10<br>[Source:MarkerSymbol;Acc:MGI:1919855]                                                     |
| 03A-0210 | 100      | 11  | 93,272,269            | Car10             | v5                   | carbonic anhydrase 10<br>[Source:MarkerSymbol;Acc:MGI:1919855]                                                     |
| 03A-0382 | 99+      | 11  | 93,393,216            | Car10             | tTA                  | carbonic anhydrase 10<br>[Source:MarkerSymbol;Acc:MGI:1919855]                                                     |
| 03A-0383 | 100      | 11  | 93,494,634            | nothing           |                      |                                                                                                                    |
| 03A-0103 | 98+      | 11  | 93,525,508            | nothing           |                      |                                                                                                                    |
| 03A-0356 | 100      | 11  | 93,635,449            | nothing           |                      |                                                                                                                    |
| 03A-0104 | 97+      | 11  | 93,973,736            | nothing           | v5                   |                                                                                                                    |
| 03A-0085 | 100      | 11  | 94,306,736            | BC018371          | v5                   | cDNA sequence BC018371<br>[Source:MarkerSymbol;Acc:MGI:2388287]                                                    |
| 03A-0211 | 100      | 11  | 95,259,178            | Spop              | tTA                  | speckle-type POZ protein. [Source: RefSeq (NM_025287)]                                                             |

Table S1 Continued

| seq ID   | identity | Chr | position <sup>a</sup> | hit <sup>b</sup>       | Orient. <sup>c</sup> | description                                                                                                                                                  |
|----------|----------|-----|-----------------------|------------------------|----------------------|--------------------------------------------------------------------------------------------------------------------------------------------------------------|
| 03A-0305 | 100      | 11  | 96,066,602            | nothing                |                      |                                                                                                                                                              |
| 03A-0052 | 100      | 11  | 96,075,928            | nothing                |                      |                                                                                                                                                              |
| 03A-0026 | 97+      | 11  | 99,081,093            | GENSCAN                |                      |                                                                                                                                                              |
| 03A-0123 | 99+      | 11  | 100,107,468           | nothing                | v5                   |                                                                                                                                                              |
| 03A-0018 | 100      | 11  | 101,198,955           | G6pc (3'UTR)           |                      | glucose-6-phosphatase, catalytic<br>[Source:MarkerSymbol;Acc:MGI]                                                                                            |
| 03A-0217 | 100      | 11  | 104,481,070           | IT_B3 MOUSE            | tTA                  | Integrin beta-3 precursor (Platelet membrane glycoprotein IIIa) (GPIIIa) (CD61 antigen).<br>[Source:Uniprot/SWISSPROT;Acc:O54890]                            |
| 03A-0087 | 100      | 11  | 104,662,430           | nothing                |                      |                                                                                                                                                              |
| 03A-0309 | 100      | 11  | 105,207,608           | Rnf190                 | tTA                  | ring finger protein 190<br>[Source:MarkerSymbol;Acc:MGI:2443469]                                                                                             |
| 03A-0298 | 100      | 11  | 105,782,146           | nothing                |                      |                                                                                                                                                              |
| 03A-0102 | 100      | 11  | 109,524,360           | nothing                |                      |                                                                                                                                                              |
| 03A-0348 | 100      | 11  | 109,812,822           | AbcaB8                 | tTA                  | ATP-binding cassette, sub-family A (ABC1), member 8b<br>[Source:MarkerSymbol;Acc:MGI:1351668]                                                                |
| 03A-0157 | 96+      | 11  | 110,949,387           | nothing                |                      |                                                                                                                                                              |
| 03A-0330 | 95+      | 11  | 110,949,394           | nothing                |                      |                                                                                                                                                              |
| 03A-0111 | 100      | 11  | 111,431,807           | nothing                |                      |                                                                                                                                                              |
| 03A-0306 | 100      | 11  | 112,040,772           | GENSCAN                | v5                   |                                                                                                                                                              |
| 03A-0363 | 100      | 12  | 7,467,396             | 1110057K04Rik<br>RIKEN | tTA                  | cDNA 1110057K04 gene (1110057K04Rik), mRNA Source: RefSeq_dna NM_172401                                                                                      |
| 03A-0198 | 100      | 12  | 88,198,854            | nothing                |                      |                                                                                                                                                              |
| 03A-0045 | 100      | 13  | 14,200,635            | GENSCAN                |                      |                                                                                                                                                              |
| 03A-0326 | 99+      | 13  | 14,200,635            | GENSCAN                |                      |                                                                                                                                                              |
| 03A-0189 | 100      | 13  | 57,440,963            | nothing                |                      |                                                                                                                                                              |
| 03A-0221 | 99+      | 13  | 57,593,094            | Ntrk2                  | v5                   | neurotrophic tyrosine kinase, receptor, type 2<br>[Source:MarkerSymbol;Acc:MGI:97384]                                                                        |
| 03A-0107 | 99+      | 13  | 64,838,138            | Adcy2                  | v5                   | adenylate cyclase 2<br>[Source:MarkerSymbol;Acc:MGI:99676]                                                                                                   |
| 03A-0175 | 99+      | 13  | 81,279,049            | nothing                |                      |                                                                                                                                                              |
| 03A-0062 | 99+      | 13  | 84,771,595            | nothing                |                      | (close to edil3)                                                                                                                                             |
| 03A-0281 | 100      | 14  | 18,955,686            | C030002J06Rik          | v5                   | cDNA C030002J06 gene (C030002J06Rik), mRNA Source: RefSeq_dna NM_176988                                                                                      |
| 03A-0137 | 99+      | 14  | 18,955,879            | C030002J06Rik          | v5                   | RIKEN cDNA C030002J06 gene (C030002J06Rik), mRNA Source: RefSeq_dna NM_176988                                                                                |
| 03A-0246 | 100      | 14  | 45,890,049            | ENSMUSESTG             | v5                   |                                                                                                                                                              |
| 03A-0148 | 98+      | 15  | 16,416,966            | LINE element           |                      |                                                                                                                                                              |
| 03A-0244 | 96+      | 15  | 75,118,722            | GENSCAN                |                      |                                                                                                                                                              |
| 03A-0311 | 99+      | 15  | 78,355,502            | Csf2rb2                | tTA                  | colony stimulating factor 2 receptor, beta 2, low affinity (granulocyte-macrophage)<br>[Source:MarkerSymbol;Acc:MGI:1339760]                                 |
| 03A-0094 | 100      | 15  | 96,087,105            | nothing                |                      |                                                                                                                                                              |
| 03A-0268 | 99+      | 16  | 14,495,274            | Prkdc                  | v5                   | protein kinase, DNA activated, catalytic polypeptide<br>[Source:MarkerSymbol;Acc:MGI:104779]                                                                 |
| 03A-0188 | 100      | 16  | 18,177,639            | nothing                |                      |                                                                                                                                                              |
| 03A-0247 | 100      | 16  | 59,361,301            | Epha6,<br>GENSCAN      | v5                   | Ephrin type-A receptor 6 precursor (EC 2.7.1.112) (Tyrosine-protein kinase receptor EHK-2) (EPH homology kinase-2).<br>[Source:Uniprot/SWISSPROT;Acc:Q62413] |
| 03A-0301 | 100      | 17  | 59,209,581            | nothing                |                      |                                                                                                                                                              |
| 03A-0316 | 98+      | 17  | 80,342,477            | ENSMUSG0000<br>0066926 | tTA                  |                                                                                                                                                              |
| 03A-0040 | 99+      | 17  | 80,342,477            | ENSMUSG0000<br>0066926 | v5                   |                                                                                                                                                              |

**Table S1 Continued**

| seq ID   | identity | Chr | position <sup>a</sup> | hit <sup>b</sup> | Orient. <sup>c</sup> | description                                                                                                                |
|----------|----------|-----|-----------------------|------------------|----------------------|----------------------------------------------------------------------------------------------------------------------------|
| 03A-0043 | 100      | 17  | 89,359,599            | nothing          |                      |                                                                                                                            |
| 03A-0323 | 100      | 17  | 89,783,047            | GENSCAN          |                      |                                                                                                                            |
| 03A-0039 | 100      | 17  | 89,783,049            | GENSCAN          |                      |                                                                                                                            |
| 03A-0327 | 100      | 17  | 89,946,909            | nothing          |                      |                                                                                                                            |
| 03A-0333 | 100      | 17  | 90,099,545            | nothing          |                      |                                                                                                                            |
| 03A-0067 | 100      | 17  | 91,800,652            | nothing          |                      |                                                                                                                            |
| 03A-0243 | 100      | 18  | 12,698,929            | Lama3            | v5                   | Laminin alpha-3 chain precursor (Nicein alpha subunit).<br>[Source:Uniprot/SWISSPROT;Acc:Q61789]                           |
| 03A-0096 | 100      | 18  | 35,406,762            | Catna1           | tTA                  | Alpha-1 catenin (102 kDa cadherin-associated protein) (CAP102) (Alpha E-catenin).<br>[Source:Uniprot/SWISSPROT;Acc:P26231] |
| 03A-0064 | 100      | 18  | 61,764,006            | ENSMUSESTG       | tTA                  |                                                                                                                            |
| 03A-0055 | 100      | 18  | 72,913,663            | GENSCAN          |                      |                                                                                                                            |
| 03A-0184 | 99+      | 19  | 10,699,206            | Ms4a4c           | tTA                  | membrane-spanning 4-domains, subfamily A, member 4C<br>[Source:MarkerSymbol;Acc:MGI:1927656]                               |

<sup>a</sup> Reported is the coordinate of the T of the target TA dinucleotide for SB transposon insertion, according to the ENSEMBL m34 NCBI build, insertions within the balanced region between *Wnt3* and *Trp52* are highlighted in blue

<sup>b</sup> Reported is the insertion into known, predicted (ENSMUSG, GENSCAN), or expressed sequence tag or cDNA (ENSMUSESTG)

<sup>c</sup> Reported is the orientation which the gene-trap tTA (Fig. 1A) inserted with respect to transcriptional orientation of the endogenous gene.
